# Supplementary material for: Silencing of Transcription Factor Sp1 Promotes SN1 Transporter Regulation by Ammonia in Mouse Cortical Astrocytes
Source: MDPI journal article supplement (doi:10.3390/ijms20020234), 2019-01-09
Supplement: s1 [file s1]

(a)

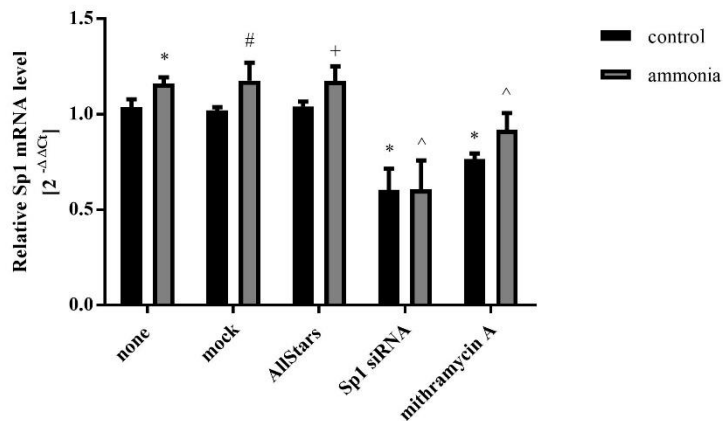

(b)

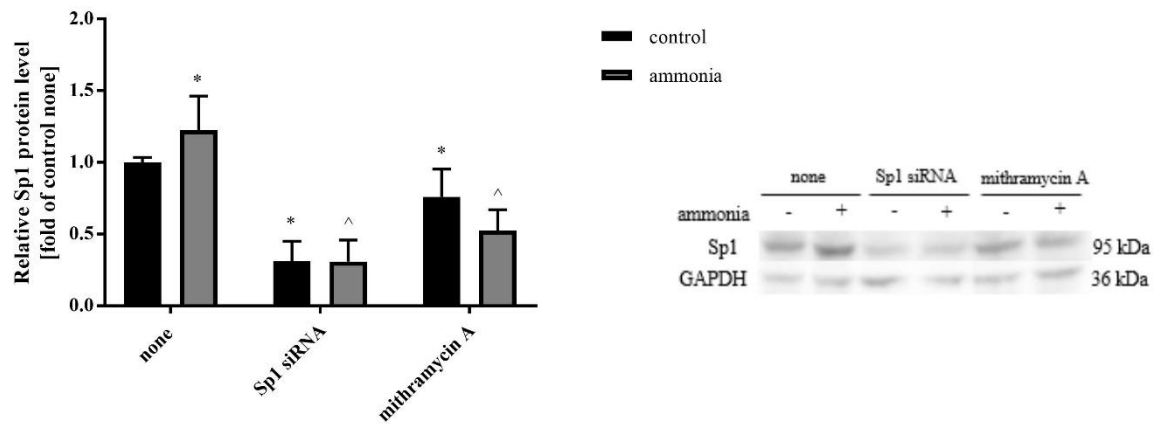

**Figure S1.** The effectiveness of Sp1 silencing by 5 nM siRNA and 10 mM mithramycin A. (a) Sp1 mRNA level. Mock is the transfection only with the transfection reagent; All Stars is a transfection with siRNA that does not silence any gene. Results are mean  $\pm$  SD ( $n = 4$ ). (\*)  $p < 0.05$  vs control none, (^)  $p < 0.05$  vs ammonia none, (#)  $p < 0.05$  vs control mock, (+)  $p < 0.05$  vs control AllStars negative control; Two-Way ANOVA, Bonferroni post-hoc test; (b) Sp1 protein level. Left panel shows densitometry, right panel shows the representative immunoblots. Results are mean  $\pm$  SD ( $n = 4$ ). (\*)  $p < 0.05$  vs control none, (^)  $p < 0.05$  vs ammonia none; Two-Way ANOVA, Bonferroni post-hoc test.

a)

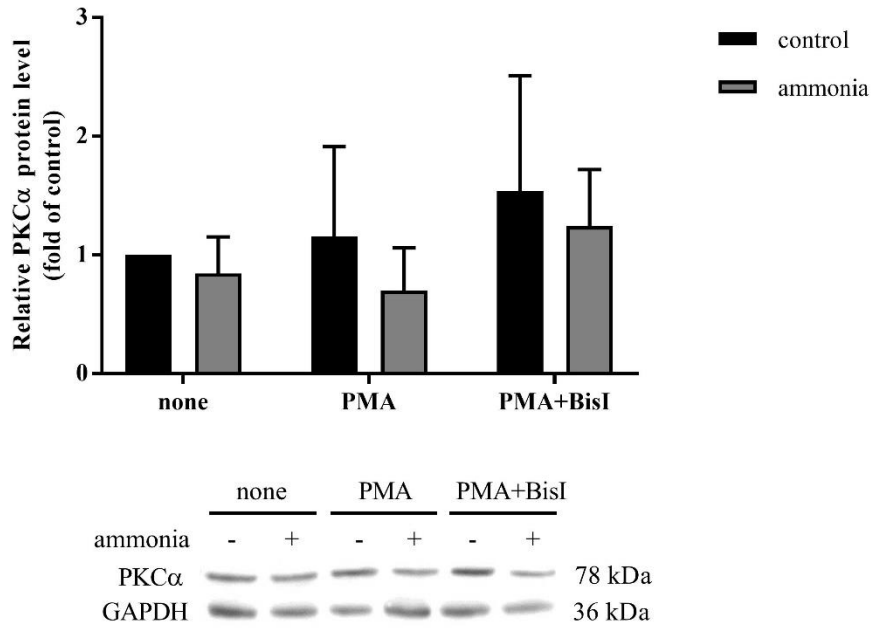

b)

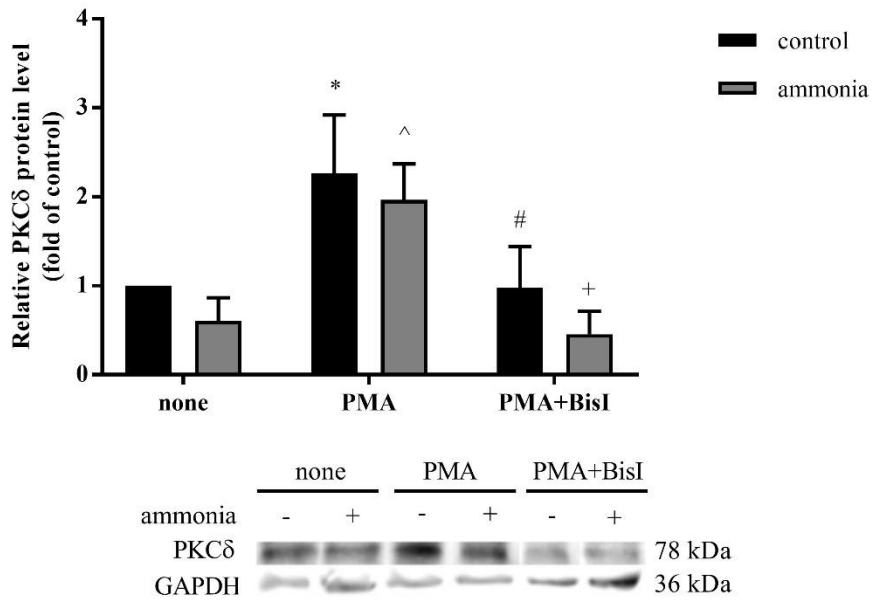

**Figure S2.** PKC isoforms  $\alpha$  (a) and  $\delta$  (b) protein level after 24-hour treatment with 200 nM PMA and pre-treatment with 1 mM BisI followed by 24-hour treatment with 200 nM PMA. Upper panel shows densitometry, lower panel shows the representative immunoblots. Results are mean  $\pm$  SD ( $n = 4$ ). (\*)  $p < 0.05$  vs control none; (^)  $p < 0.05$  vs ammonia none; (#)  $p < 0.05$  vs control PMA; (+)  $p < 0.05$  vs ammonia PMA; Two-Way ANOVA, Bonferroni post-hoc test.
